# Supplementary material for: Highly photo- and electroluminescent 1,3-diketonate Eu(iii) complexes with spiro-fluorene-xantphos dioxide ligands: synthesis and properties
Source: Royal Society of Chemistry journal article supplement (doi:10.1039/c3tc30783b), 2013-01-01
Supplement: c3tc30783b.pdf [file c3tc30783b.pdf]

Electronic Supporting Information:

## Highly Photo-, and Electroluminescent 1,3-Diketonate Eu(III) Complexes With Spiro-Fluorene-Xanthos Dioxide Ligand. Synthesis and Properties.

By Marek Pietraszkiewicz\*<sup>1</sup> and Michal Maciejczyk<sup>1</sup>, Ifor D. W. Samuel\*<sup>2</sup> and Shuyu Zhang<sup>2</sup>

<sup>1</sup>) Institute of Physical Chemistry, Polish Academy of Sciences, PL-01224 Warsaw, Kasprzaka 44/52, Poland, e-mail: mpietraszkiewicz@ichf.edu.pl

<sup>2</sup>) Organic Semiconductor Centre, SUPA, School of Physics and Astronomy, University of St. Andrews, North Haugh, St. Andrews, Fife, KY16 9SS, U.K. E-mail: idws@st-andrews.ac.uk

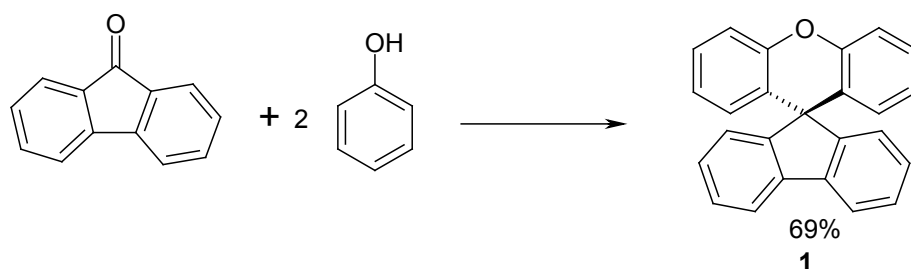

Scheme S1: Spiro-fluorene-xanthene (1) synthesis: MeSO<sub>3</sub>H, 1,2-dichlorobenzene, 24h, 150°C

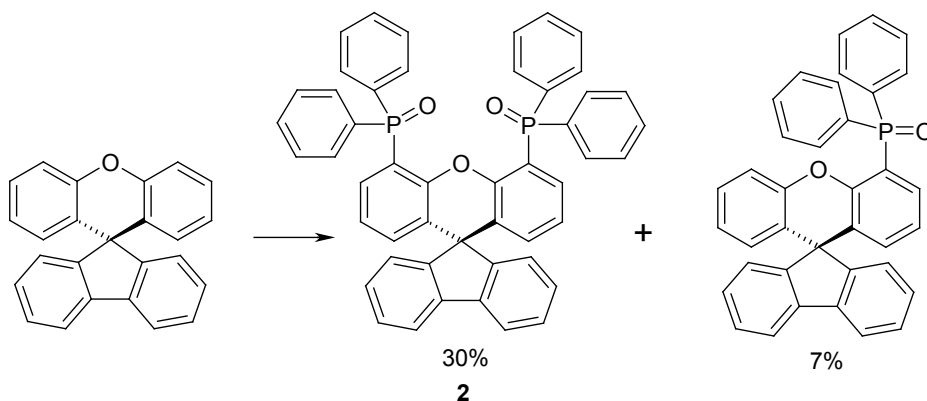

Scheme S2: Spiro-fluorene-xanthene diphosphine oxide (2) synthesis: 1) n-BuLi, TMEDA, hexane, 1h, reflux, Ar; 2) Ph<sub>2</sub>P(OR)<sub>2</sub>, 12h, 0°C to r.t.; 3) 30% H<sub>2</sub>O<sub>2</sub>, 1,4-dioxane, 2h, r.t.

### Synthetic and analytical data of novel compounds

All conventional chemicals were purchased from Aldrich, and were used as received. THF was distilled over LiAlH<sub>4</sub> prior to use.

#### 3.2. Synthesis

3.2.1. *Spiro[fluorene-9,9'-xanthene]* (1). A mixture of fluorenone (0.3 g, 1.667 mmol, 1 equiv) and methanesulfonic acid (MeSO<sub>3</sub>H, d=1.48 g/mL, 0.43 mL, 6.668 mmol, 4 equiv) in dichlorobenzene was added to phenol (1.567 g, 16.67 mmol, 10 eq) at 100°C during 1h. The mixture was heated at 150°C under argon for 24 h. The reaction mixture was then slowly added into water (25 mL) and extracted with dichloromethane. The combined extracts were

dried over  $\text{MgSO}_4$ , filtered, evaporated, and purified by column chromatography (hexane:ethyl acetate, 10:1) to afford colorless solid SFX (0.382 g, 69%). M.p.: 212-213°C.  $^1\text{H}$  NMR (400 MHz,  $\text{CDCl}_3$ , ppm):  $\delta$  = 7.87 (d,  $J$  = 7.6 Hz, 2H), 7.45 (ddd,  $J$  = 7.6 Hz,  $J$  = 6.4 Hz,  $J$  = 2.2 Hz, 2H), 7.32-7.20 (m, 8H), 6.85 (ddd,  $J$  = 7.1 Hz,  $J$  = 2.3 Hz, 2H), 6.51 (m, 1H), 6.47 (d,  $J$  = 1.3 Hz, 1H).

3.2.2. *4',5'-Bis-(diphenyl-phosphinoyl)-spiro[fluorene-9,9'-xanthene]* (**2**). At room temp. *n*-butyllithium (7.3 mL, 18.361 mmol, 3.2 eq) in *n*-hexane was added within 40 min. to a solution of SFX (1.905 g, 5.738 mmol) and of TMEDA (2.134 g, 2.77 mL, 18.361 mmol, 3.2 eq) in hexane. The mixture was heated at reflux for 1 h and then cooled to 0°C after what a solution of  $\text{Ph}_2\text{PCl}$  (2.87 g, 2.4 mL, 18.361 mL, 3.2 eq) in hexane (10 mL) was added within 1 h. After stirring at room temp. for 12 h the mixture was cooled to 0°C and obtained precipitate was filtered off and washed with hexane and water. A 30% aqueous  $\text{H}_2\text{O}_2$  solution (2 mL) was added to the solution of obtained products mixture in 1,4-dioxane. After stirring for 2 h, the reaction was worked up with  $\text{CH}_2\text{Cl}_2$  and water. After drying over  $\text{Na}_2\text{SO}_4$  and filtering the solvent was evaporated and the residue was purified by column chromatography (hexane:acetone, 1:1) to afford colorless solids of diphenylphosphine oxide derivative (0.181 g, 7%). M.p.: 238-240°C and bis-diphenylphosphine oxide derivative (1.241 g, 30%). M.p.: 305-306°C. Diphenylphosphine oxide of SFX:  $^1\text{H}$  NMR (200 MHz,  $\text{CDCl}_3$ , ppm):  $\delta$  = 6.37-6.42 (m, 2H); 6.62-6.78 (m, 2H); 6.84-8.00 (m, 21H). MS (EI, 70 eV):  $m/z$  (%) = 532,1 (M<sup>+</sup>, 100), 331 (M<sup>+</sup>(-POPh<sub>2</sub>), 15,62). Bis-diphenylphosphine oxide of SFX:  $^1\text{H}$  NMR (200 MHz,  $\text{CDCl}_3$ , ppm):  $\delta$  = 7.80 (d,  $J$  = 7.7 Hz, 2H), 7,57-7.18 (m, 26H), 6.95-6.85 (m, 2H), 6.70 (ddd,  $J$  = 7.7 Hz,  $J$  = 1.9 Hz, 2H), 6.60 (d,  $J$  = 7.7 Hz, 2H), 1.88 (bs, 2xH<sub>2</sub>O, 4H).  $^{31}\text{P}$  NMR (400 MHz,  $\text{CDCl}_3$ , ppm):  $\delta$  = 29.16. Elemental anal. (%): calcd. for  $\text{C}_{49}\text{H}_{34}\text{O}_3\text{P}_2 + 2\text{xH}_2\text{O}$ : C, 76.55; H, 4.98; found C, 76.45; H, 4.99. MS (EI, 70 eV):  $m/z$  (%) = 732 (M<sup>+</sup>, 93), 731 (M-1, 100), 655 (M<sup>+</sup>(-Ph), 25), 639(M<sup>+</sup>(-Ph,-O),32).

3.2.3. *Complex 4',5'-bis-(diphenyl-phosphinoyl)-spiro[fluorene-9,9'-xanthene] with tris-(thenoyltrifluoroacetate) europium(III)* (**3**). Equimolar solution of  $\text{Eu}(\text{tta})_3$  (0.164 g, 0.2 mmol) and bis-diphenylphosphine oxide (0.146 g, 0.2 mmol) in chloroform was stirred at reflux for 24 h. The product was obtained as a light orange powder at daylight (0.233 g, 75%) after solvent evaporation and recrystallization from chloroform-hexane mixture. M.p.: 238-240°C.  $^{31}\text{P}$  NMR (400 MHz,  $\text{CDCl}_3$ , ppm):  $\delta$  = -86.04. Elemental anal. (%): calcd. for  $\text{C}_{73}\text{H}_{46}\text{O}_9\text{P}_2\text{F}_9\text{S}_3\text{Eu} + \text{H}_2\text{O}$ : C, 55.98; H, 3.09; found C, 55.97; H, 3.19. MS (TOF MS FD+ 26.7, 9 kV):  $m/z$  (%) = 2059.1 ( $\text{Eu}(\text{tta})_2 + 2 \times$  phosphine oxide), 1327 (M- tta).

3.2.4. *Complex 4',5'-bis-(diphenyl-phosphinoyl)-spiro[fluorene-9,9'-xanthene] with tris-(hexafluoroacetylacetonate) europium(III)* (**4**). Complex 4 was synthesized using the same reaction and workup procedure as that of 3 but employing  $\text{Eu}(\text{hfac})_3$  and yielded 0.105 g (35%) as a light yellow powder. M.p.: 255-256°C.  $^{31}\text{P}$  NMR (400 MHz,  $\text{CDCl}_3$ , ppm):  $\delta$  = -109.67. Elemental anal. (%): calcd. for  $\text{C}_{64}\text{H}_{37}\text{O}_9\text{P}_2\text{Eu} + \text{H}_2\text{O}$ : C, 50.44; H, 2.58; found C, 50.53; H, 2.51. MS (TOF MS):  $m/z$  (%) = 1711.4 (M<sup>+</sup> 1+ hfac), 1487.4 (M- F).

3.2.5. *Complex 4',5'-bis-(diphenyl-phosphinoyl)-spiro[fluorene-9,9'-xanthene] with tris-(naphthoiltrifluoroacetate) europium(III)* (**5**). Complex 5 was synthesized using the same reaction and workup procedure as that of 3 but employing  $\text{Eu}(\text{nta})_3$  and yielded 0.165 g (49%) as a light yellow powder. M.p.: 244-245°C.  $^{31}\text{P}$  NMR (400 MHz,  $\text{CDCl}_3$ , ppm):  $\delta$  = -79.50. Elemental anal. (%): calcd. for  $\text{C}_{91}\text{H}_{60}\text{O}_{10}\text{P}_2\text{Eu} + \text{H}_2\text{O}$ : C, 64.36; H, 3.56; found C, 64.01; H, 3.36. MS (TOF MS):  $m/z$  (%) = 1415 (M- nta).

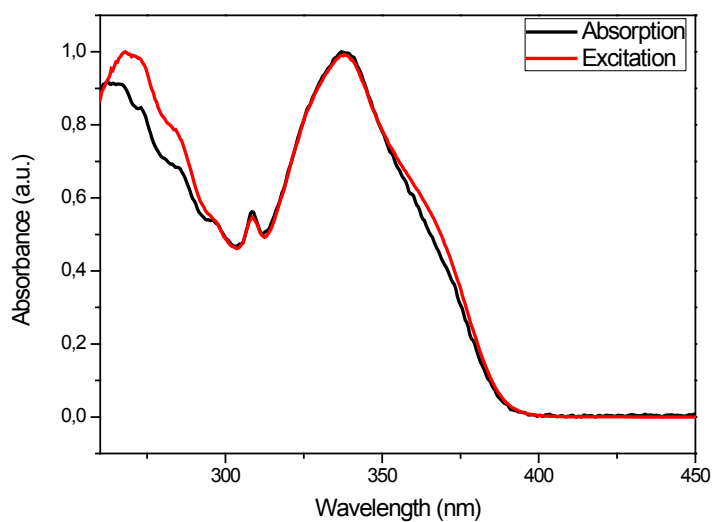

Figure S2: Absorption and excitation spectra of Eu(tta)<sub>3</sub>SFXPO

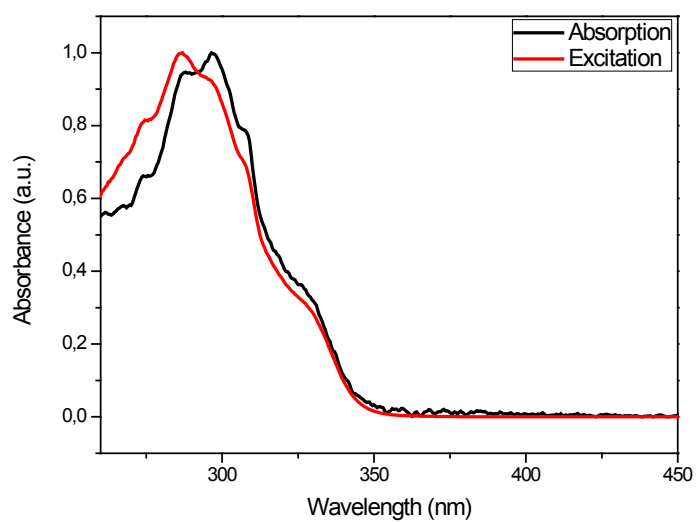

Figure S3: Absorption and excitation spectra of Eu(hfac)<sub>3</sub>SFXPO

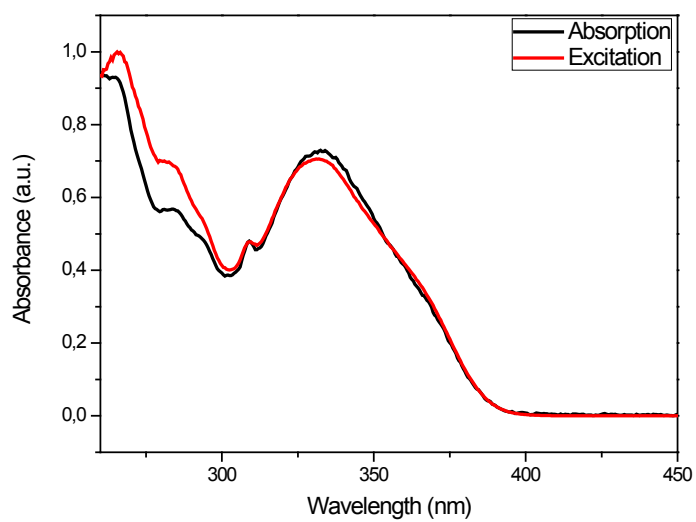

Figure S4: Absorption and excitation spectra of  $\text{Eu}(\text{nta})_3\text{SFXPO}$

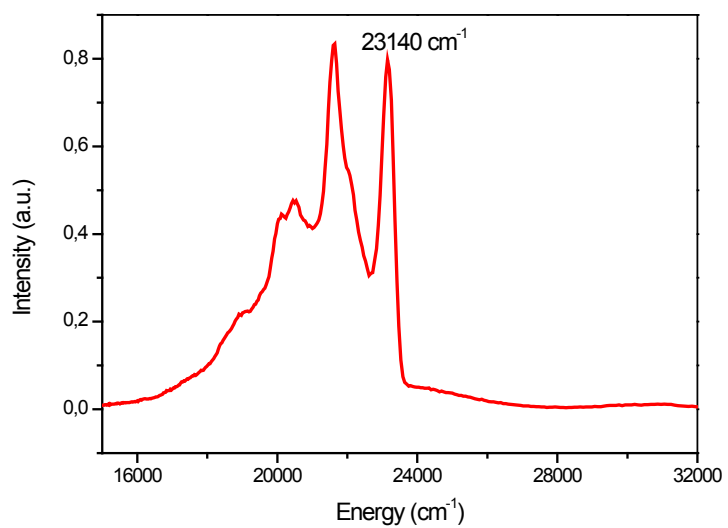

Figure S5: Phosphorescence spectrum of SFXPO in 2-methyltetrahydrofuran at 77 K

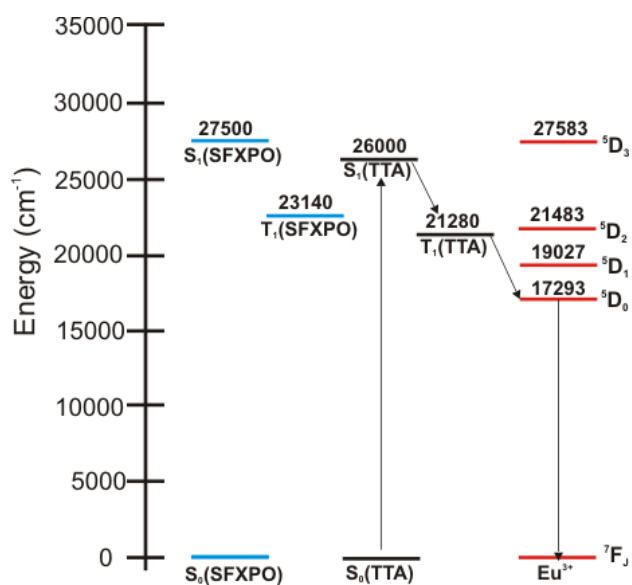

Figure S6: Energy levels for SFXPO, tta ligands and Eu(III)

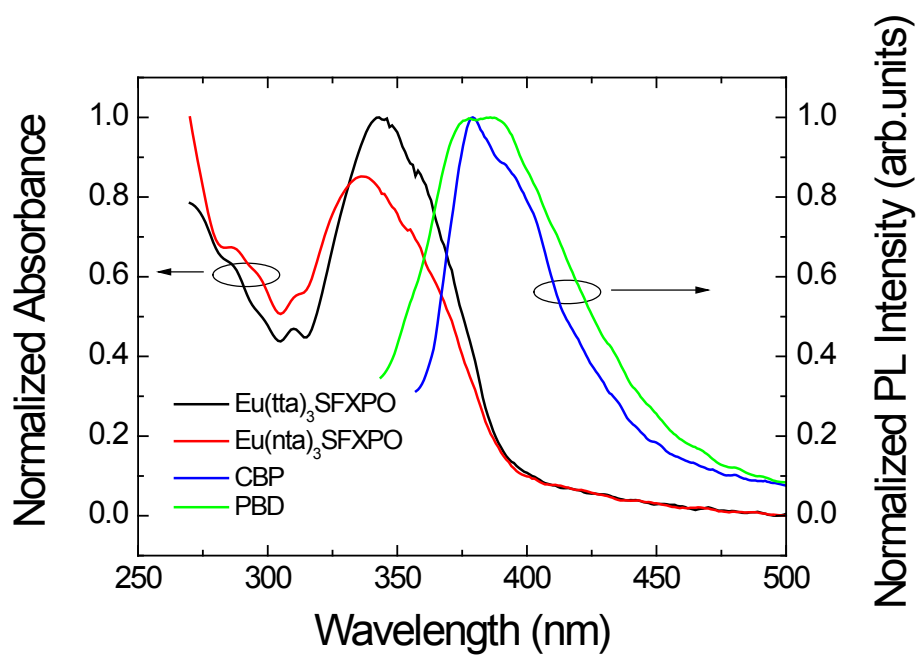

Figure S7: Absorption spectra of Eu(III) complexes and emission of host materials.

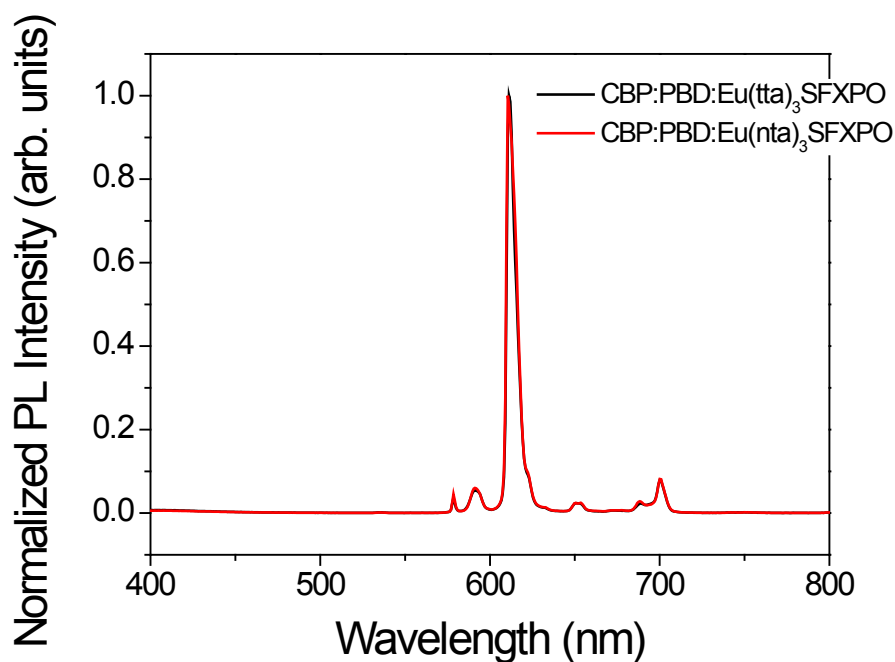

Figure S8: Photoluminescence spectra of the Eu(III) complexes in blend: CBP and PBD.

Table S1: photoluminescent properties of ternary complexes in neat complexes and their blends with CBP:PBD

|            | CBP:PBD ratio (wt %) | Eu(tta) <sub>3</sub> SFXPO |       |                    | Eu(nta) <sub>3</sub> SFXPO |       |                    |
|------------|----------------------|----------------------------|-------|--------------------|----------------------------|-------|--------------------|
|            |                      | PLQY (%)                   | ABS   | Ex Wavelength (nm) | PLQY (%)                   | ABS   | Ex Wavelength (nm) |
| Neat Eu    | N/A                  | 71.3                       | 0.238 | 380                | 64                         | 0.218 | 380                |
| CBP:PBD:Eu | 100:0                | 76.6                       | 0.726 | 325                | 80.4                       | 0.742 | 325                |
| CBP:PBD:Eu | 70:30                | 78.6                       | 0.762 | 325                | 82.7                       | 0.776 | 325                |
| CBP:PBD:Eu | 50:50                | 80.8                       | 0.763 | 325                | 84.8                       | 0.764 | 325                |
| CBP:PBD:Eu | 30:70                | 81.4                       | 0.798 | 325                | 84.2                       | 0.781 | 325                |
| CBP:PBD:Eu | 0:100                | 84.6                       | 0.791 | 325                | 86.2                       | 0.766 | 325                |

All PLQY values are tested under N<sub>2</sub> environment.

Samples are dissolved in DCM with a concentration of 10mg/ml. Spincoating rate: 2500rpm, 60s, 50 ramp. Europium complex is always 5 weight %.
